# Supplementary material for: Macrophage polarization toward M1 phenotype in T cell transfer colitis model
Source: Springer Nature journal article supplement (doi:10.1186/s12876-023-03054-1), 2023-11-27
Supplement: MOESM1 [file 26363254]

Effect of the interaction with M1 macrophages on the production of IL-17A in the coculture supernatant.

After 48 h, protein levels were determined using ELISA.

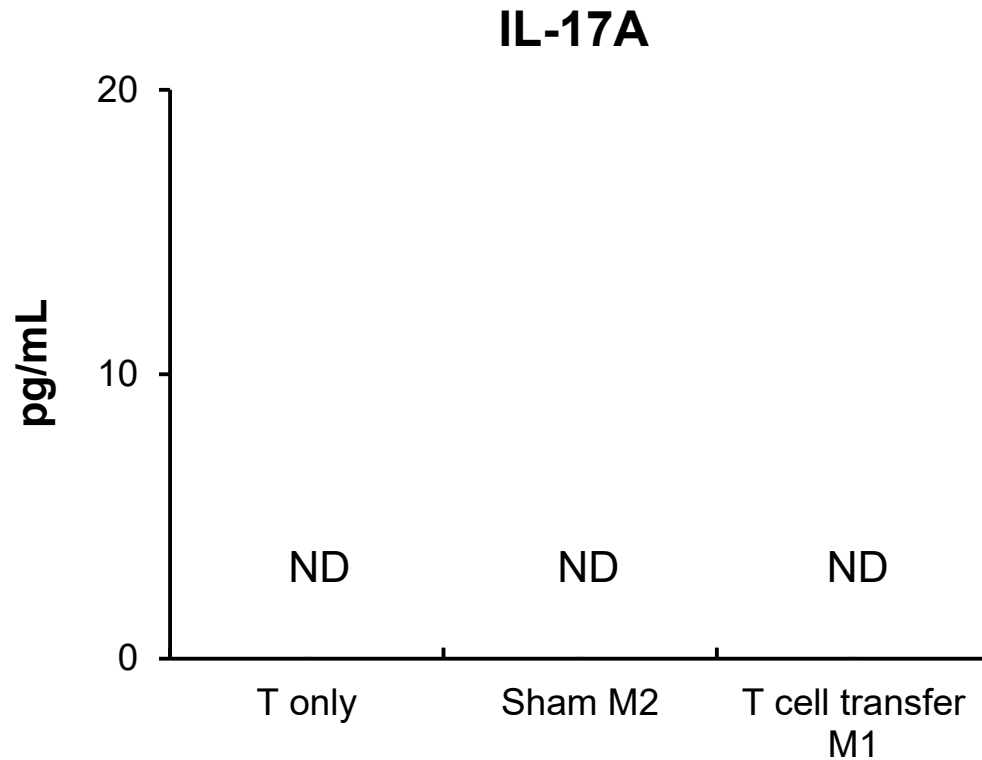

Additional file 1
